# Supplementary material for: Clinical characteristics, treatment outcomes and potential novel therapeutic options for patients with neuroendocrine carcinoma of the prostate
Source: PubMed Central journal article supplement (PMC6343754; doi:10.18632/oncotarget.26523), 2019-01-01
Supplement: oncotarget-10-17-s001.pdf [file oncotarget-10-17-s001.pdf]

## Clinical characteristics, treatment outcomes and potential novel therapeutic options for patients with neuroendocrine carcinoma of the prostate

### SUPPLEMENTARY MATERIALS

**Supplementary Table 1: Overall survival proportion estimates for different subgroups**

|                             |                | 6-month survival (95 % CI) | 12-month survival (95 % CI) |
|-----------------------------|----------------|----------------------------|-----------------------------|
| Histology                   | Small cell     | 0.85 (0.69 - 1.00)         | 0.61 (0.37 - 0.85)          |
|                             | Non-small cell | 0.67 (0.49 - 0.85)         | 0.54 (0.34 - 0.74)          |
| Mixed differentiation       | Yes            | 0.85 (0.69 - 1.00)         | 0.62 (0.40 - 0.84)          |
|                             | No             | 0.68 (0.50 - 0.86)         | 0.53 (0.33 - 0.73)          |
| Prior adenocarcinoma        | Yes            | 0.50 (0.26 - 0.74)         | 0.38 (0.14 - 0.62)          |
|                             | No             | 0.92 (0.80 - 1.00)         | 0.69 (0.49 - 0.89)          |
| Ki67                        | ≥ 55 %         | 0.71 (0.53 - 0.89)         | 0.43 (0.23 - 0.63)          |
|                             | < 55 %         | 0.76 (0.47 - 1.00)         | 0.63 (0.30 - 0.96)          |
| PSA                         | > ULN          | 0.69 (0.51 - 0.87)         | 0.51 (0.31 - 0.71)          |
|                             | ≤ ULN          | 0.67 (0.30 - 1.00)         | 0.67 (0.30 - 1.00)          |
| NSE                         | > ULN          | 0.66 (0.46 - 0.86)         | 0.44 (0.22 - 0.66)          |
|                             | ≤ ULN          | 1.00 (1.00 - 1.00)         | 1.00 (1.00 - 1.00)          |
| CgA                         | > ULN          | 0.65 (0.38 - 0.92)         | 0.55 (0.26 - 0.84)          |
|                             | ≤ ULN          | 1.00 (1.00 - 1.00)         | 0.60 (0.00 - 1.00)          |
| LDH                         | > ULN          | 0.50 (0.23 - 0.77)         | 0.28 (0.01 - 0.55)          |
|                             | ≤ ULN          | 0.89 (0.75 - 1.00)         | 0.71 (0.49 - 0.93)          |
| Stage                       | Localized      | 0.75 (0.46 - 1.00)         | 0.60 (0.25 - 0.95)          |
|                             | Metastatic     | 0.75 (0.61 - 0.89)         | 0.57 (0.39 - 0.75)          |
| Visceral metastases         | Yes            | 0.80 (0.66 - 0.94)         | 0.53 (0.33 - 0.73)          |
|                             | No             | 0.66 (0.42 - 0.90)         | 0.66 (0.42 - 0.90)          |
| Palliative systemic therapy | Yes            | 0.85 (0.73 - 0.97)         | 0.62 (0.44 - 0.80)          |
|                             | No             | 0.27 (0.00 - 0.64)         | 0.27 (0.00 - 0.64)          |
